# Supplementary material for: Spectroscopic and magnetic investigation of the K5[PMo2VW9O40]· 24H2O heteropolyoxometalate and its monoprotonated form †
Source: Royal Society of Chemistry journal article supplement (doi:10.1039/b004871m), 2000-01-01
Supplement: b004871m.doc [file b004871m.doc]

Supplementary Material: B004871M

**Infrared data**

The coordination of the vanadium ion with Oa and Ob type atoms results by comparing the shape of the complex and the ligand spectra in 750850 cm1 region. The *as*(WOa) (760 cm1) and *as*(WObW) (840 cm1) vibration bands form one single strong broad band in the complex spectrum, centered approximately at the average of the frequencies mentioned above (805 cm1). These important shifts of the vibration bands are due to the alteration of the valence forces in the complex, compared to the monovacant ligand.22 The near values of the MO group vibrations in the mixed addends polyanions (M = W, Mo) determine their superposition in broad bands, if not the overlapping of the bands of different type groups.23

The presence of a single *as*(POa) asymmetric band in the IR spectrum of the ligand corresponds to a high symmetry PO4 unit. This fact suggests the equivalence of molybdenum and tungsten atoms when coordinated by the Oa central atoms. The involvement of the VIV ion in the coordination to heteropolyoxometalate causes the lowering of the local symmetry to Cs around the phosphorus atom and leads to the splitting of the *as*(POa) band in four bands.24 The presence of the fourth band is due to the coexistence of nonequivalent Keggin units in the sample.11

The shifts of the deformation and stretching vibration bands of the water molecules are due to the raising of the basic character of the Od atoms bound to the vanadium(IV) ion and to their involvement in hydrogen bonds.25

The IR data indicate the coordination of one vanadyl group in the lacunary region of the -[PMo2W9O39]7 anion, its coordination with Oa, Ob and Oc oxygen type atoms and the presence of different isomers in the sample.

***Table 1*** *Some IR bands of the ligand and the VIVHPOM complex*

| Band | Ligand /cm1 | Complex /cm1 |
| --- | --- | --- |
| *s*(POa) | 503w (br)  535w (br) | 493w (br)  518w (br) |
| *as*(POW) | 595w (sh)  625w (br) | 600w (sh)  620m |
| *as*(W) | 715s (br) | 685w (br) |
| *as*(WObW) + *as*(WOa) | 760s (br)  840s (br) | 805s (br) |
| *as*(WOcW) | 880s  890s | 890m |
| *as*(W=Od) + *as*(Mo=Od)+  + *as*(V=Od) | 937s  1015w | 965s  980s (sh) |
| *as*(POa) | 1065s | 1065s  1090s  1117s  1150m (sh) |
| **(HOH) | 1645m | 1630m (br)  1640m (br)  1650m (sh) |
| **(H2O) | 29503700s (br) | 31503700s (br) |

w-weak, m-medium, s-strong, sh-shoulder, br-broad
